# Supplementary material for: Energy crops affecting farmland birds in Central Europe: insights from a miscanthus-dominated landscape
Source: PubMed Central journal article supplement (PMC6315014; doi:10.2478/s11756-018-0143-1), 2018-11-05
Supplement: 11756_2018_143_MOESM1_ESM.pdf [file 11756_2018_143_MOESM1_ESM.pdf]

**Article: Energy crops affecting farmland birds in Central Europe: insights from a miscanthus-dominated landscape**

**Journal: *Biologia***

**Authors: Jan M. Kaczmarek\*, Tadeusz Mizera & Piotr Tryjanowski**

\*Corresponding author; Institute of Zoology, Poznań University of Life Sciences, Wojska Polskiego 71C, 60-625 Poznań, Poland; email: kaczmara@up.poznan.pl

**Online Resource 1.** Land cover in the study plots (i.e. buffers with a 150 m radius around observation points). Values for each visit were summed to provide a standardized estimate of land cover in each season. Differences in values between the seasons are a consequence of varying number of visits to study plots as well as agricultural activity.

| COVER TYPE              | EARLY SPRING |        | BREEDING SEASON |        | SUMMER    |        | AUTUMN    |        | WINTER    |        | TOTAL     |        |
|-------------------------|--------------|--------|-----------------|--------|-----------|--------|-----------|--------|-----------|--------|-----------|--------|
|                         | Area [ha]    | %      | Area [ha]       | %      | Area [ha] | %      | Area [ha] | %      | Area [ha] | %      | Area [ha] | %      |
| Cereals                 | 39.89        | 23.48  | 137.11          | 26.89  | 45.37     | 12.45  | 37.12     | 18.48  | 59.31     | 23.41  | 318.80    | 21.27  |
| Low marginal vegetation | 15.43        | 9.08   | 45.70           | 8.97   | 32.73     | 8.98   | 17.56     | 8.75   | 21.79     | 8.60   | 133.21    | 8.89   |
| Meadows                 | 20.79        | 12.24  | 59.52           | 11.68  | 39.29     | 10.78  | 19.80     | 9.86   | 30.10     | 11.88  | 169.50    | 11.31  |
| Miscanthus              | 53.06        | 31.23  | 153.21          | 30.05  | 100.93    | 27.68  | 51.89     | 25.83  | 74.54     | 29.42  | 433.63    | 28.94  |
| Orchards                | 3.36         | 1.97   | 10.03           | 1.97   | 6.33      | 1.73   | 4.82      | 2.40   | 4.91      | 1.94   | 29.45     | 1.97   |
| Other crops             | 9.77         | 5.75   | 52.70           | 10.34  | 24.94     | 6.84   | 17.58     | 8.76   | 18.60     | 7.34   | 123.59    | 8.25   |
| Shrubs                  | 1.25         | 0.73   | 3.70            | 0.72   | 2.52      | 0.69   | 1.32      | 0.66   | 1.59      | 0.63   | 10.38     | 0.69   |
| Stubble/ploughed fields | 17.24        | 10.14  | 20.29           | 3.98   | 93.90     | 25.76  | 39.84     | 19.84  | 28.61     | 11.29  | 199.88    | 13.34  |
| Trees                   | 9.16         | 5.39   | 27.55           | 5.40   | 18.58     | 5.09   | 10.91     | 5.43   | 13.90     | 5.49   | 80.10     | 5.35   |
| SUM                     | 169.93       | 100.00 | 509.80          | 100.00 | 364.59    | 100.00 | 200.83    | 100.00 | 253.35    | 100.00 | 1498.50   | 100.00 |
