# Supplementary material for: Energy crops affecting farmland birds in Central Europe: insights from a miscanthus-dominated landscape
Source: PubMed Central journal article supplement (PMC6315014; doi:10.2478/s11756-018-0143-1), 2018-11-05
Supplement: 11756_2018_143_MOESM2_ESM.pdf [file 11756_2018_143_MOESM2_ESM.pdf]

**Article: Energy crops affecting farmland birds in Central Europe: insights from a miscanthus-dominated landscape**

**Journal: Biologia**

**Authors: Jan M. Kaczmarek\*, Tadeusz Mizera & Piotr Tryjanowski**

\*Corresponding author; Institute of Zoology, Poznań University of Life Sciences, Wojska Polskiego 71C, 60-625 Poznań, Poland; email: [kaczmarq@up.poznan.pl](mailto:kaczmarq@up.poznan.pl)

**Online Resource 2**

**Online Resource 2.** Species list with a number of sightings of each species during the study. The number of sightings is shown for miscanthus fields and for all other habitats combined.

| Species                                                      | Miscanthus | Other habitats | Species                                                     | Miscanthus | Other habitats |
|--------------------------------------------------------------|------------|----------------|-------------------------------------------------------------|------------|----------------|
| Skylark <i>Alauda arvensis</i> L., 1758                      | 299        | 1019           | Grasshopper warbler <i>Locustella naevia</i> (Bodd., 1783)  | -          | 1              |
| Marsh warbler <i>Acrocephalus palustris</i> (Bechst., 1798)  | 28         | 11             | Woodlark <i>Lullula arborea</i> (L., 1758)                  | 3          | 1              |
| Reed warbler <i>Acrocephalus scirpaceus</i> (Herm., 1804)    | -          | 2              | Rufous nightingale <i>Luscinia megarhynchos</i> Brehm, 1831 | -          | 7              |
| Linnet <i>Carduelis cannabina</i> (L., 1758)                 | 11         | 36             | Corn bunting <i>Miliaria calandra</i> (L., 1758)            | 97         | 412            |
| Sparrowhawk <i>Accipiter nisus</i> (L., 1758)                | -          | 2              | Spotted flycatcher <i>Muscicapa striata</i> (Pall., 1764)   | -          | 1              |
| Long-tailed tit <i>Aegithalos caudatus</i> (L., 1758)        | -          | 12             | White wagtail <i>Motacilla alba</i> L., 1758                | 1          | 17             |
| Mallard <i>Anas platyrhynchos</i> L., 1758                   | 2          | 4              | Yellow wagtail <i>Motacilla flava</i> L., 1758              | 16         | 35             |
| Meadow pipit <i>Anthus pratensis</i> (L., 1758)              | -          | 16             | Northern wheatear <i>Oenanthe oenanthe</i> (L., 1758)       | 1          | 5              |
| Grey heron <i>Ardea cinerea</i> L., 1758                     | -          | 2              | Golden oriole <i>Oriolus oriolus</i> (L., 1758)             | -          | 14             |
| Buzzard <i>Buteo buteo</i> (L., 1758)                        | 2          | 30             | Tree sparrow <i>Passer montanus</i> (L., 1758)              | 60         | 683            |
| Rough-legged buzzard <i>Buteo lagopus</i> (Pont., 1763)      | -          | 1              | Pheasant <i>Phasianus colchicus</i> L., 1758                | -          | 1              |
| Greenfinch <i>Carduelis chloris</i> (L., 1758)               | -          | 34             | Chiffchaff <i>Phylloscopus collybita</i> (Vieill., 1817)    | 1          | 15             |
| Goldfinch <i>Carduelis carduelis</i> (L., 1758)              | 12         | 158            | Wood warbler <i>Phylloscopus sibilatrix</i> (Bechst., 1793) | -          | 1              |
| White stork <i>Ciconia ciconia</i> (L., 1758)                | -          | 8              | Willow warbler <i>Phylloscopus trochilus</i> (L., 1758)     | -          | 4              |
| Marsh harrier <i>Circus aeruginosus</i> (L., 1758)           | -          | 2              | Magpie <i>Pica pica</i> (L., 1758)                          | -          | 20             |
| Montagu's harrier <i>Circus pygargus</i> (L., 1758)          | -          | 1              | Great tit <i>Parus major</i> L., 1758                       | 19         | 141            |
| Stock dove <i>Columba oenas</i> L., 1758                     | -          | 50             | Willow tit <i>Poecile montanus</i> (Conrad, 1827)           | 1          | 1              |
| Hooded crow <i>Corvus cornix</i> L., 1758                    | -          | 97             | Black redstart <i>Phoenicurus ochrurus</i> (Gmel., 1774)    | -          | 3              |
| Raven <i>Corvus corax</i> L., 1758                           | 15         | 99             | Green woodpecker <i>Picus viridis</i> L., 1758              | -          | 6              |
| Woodpigeon <i>Columba palumbus</i> L., 1758                  | -          | 345            | Grey partridge <i>Perdix perdix</i> (L., 1758)              | 9          | 3              |
| Quail <i>Coturnix coturnix</i> (L., 1758)                    | 5          | 9              | Bullfinch <i>Pyrrhula pyrrhula</i> (L., 1758)               | -          | 7              |
| Siskin <i>Carduelis spinus</i> (L., 1758)                    | -          | 118            | Goldcrest <i>Regulus regulus</i> (L., 1758)                 | -          | 3              |
| Hawfinch <i>Coccothraustes coccothraustes</i> (L., 1758)     | -          | 9              | Starling <i>Sturnus vulgaris</i> L., 1758                   | 22         | 1019           |
| Cuckoo <i>Cuculus canorus</i> L., 1758                       | -          | 4              | Whitethroat <i>Sylvia communis</i> Lath., 1787              | 4          | 51             |
| Blue tit <i>Cyanistes caeruleus</i> (L., 1758)               | 33         | 81             | Blackcap <i>Sylvia atricapilla</i> (L., 1758)               | -          | 18             |
| Great spotted woodpecker <i>Dendrocopos major</i> (L., 1758) | -          | 15             | Collared dove <i>Streptopelia decaocto</i> (Friv., 1838)    | -          | 2              |
| Lesser spotted woodpecker <i>Dryobates minor</i> (L., 1758)  | -          | 1              | Nuthatch <i>Sitta europaea</i> L., 1758                     | -          | 7              |
| Black woodpecker <i>Dryocopus martius</i> (L., 1758)         | -          | 13             | Stonechat <i>Saxicola rubicola</i> (L., 1766)               | 13         | 7              |
| Robin <i>Erithacus rubecula</i> (L., 1758)                   | -          | 6              | Whinchat <i>Saxicola rubetra</i> (L., 1758)                 | 38         | 27             |
| Yellowhammer <i>Emberiza citrinella</i> L., 1758             | 70         | 497            | Serin <i>Serinus serinus</i> (L., 1766)                     | -          | 3              |
| Reed bunting <i>Emberiza schoeniclus</i> L., 1758            | 36         | 21             | Lesser whitethroat <i>Sylvia curruca</i> (L., 1758)         | -          | 6              |
| Kestrel <i>Falco tinnunculus</i> L., 1758                    | -          | 2              | Wren <i>Troglodytes troglodytes</i> (L., 1758)              | -          | 2              |
| Chaffinch <i>Fringilla coelebs</i> L., 1758                  | 1          | 208            | Song thrush <i>Turdus philomelos</i> Brehm, 1831            | -          | 12             |
| Jay <i>Garrulus glandarius</i> (L., 1758)                    | 2          | 57             | Blackbird <i>Turdus merula</i> L., 1758                     | 8          | 57             |
| Crested lark <i>Galerida cristata</i> (L., 1758)             | -          | 2              | Mistle thrush <i>Turdus viscivorus</i> L., 1758             | 1          | -              |
| Crane <i>Grus grus</i> (L., 1758)                            | 3          | 43             | Fieldfare <i>Turdus pilaris</i> L., 1758                    | -          | 465            |
| Barn swallow <i>Hirundo rustica</i> L., 1758                 | -          | 1              | Hoopoe <i>Upupa epops</i> L., 1758                          | -          | 3              |
| Icterine warbler <i>Hippolais icterina</i> (Vieill., 1817)   | -          | 13             | Lapwing <i>Vanellus vanellus</i> (L., 1758)                 | -          | 21             |
| Wryneck <i>Jynx torquilla</i> L., 1758                       | -          | 5              |                                                             |            |                |
